# Supplementary material for: The Histone H4 Lysine 20 Monomethyl Mark, Set by PR-Set7 and Stabilized by L(3)mbt, Is Necessary for Proper Interphase Chromatin Organization
Source: PubMed Central journal article supplement (PMC3443217; doi:10.1371/journal.pone.0045321), 2012-09-14
Supplement: pone.0045321.s003.pdf [file pone.0045321.s003.pdf]

|          |                | PH2Av pos. | % positive |
|----------|----------------|------------|------------|
| non-irr. | <i>WT</i>      | 80         | 10         |
|          | <i>PR-Set7</i> | 113        | 13         |
| irr.     | <i>WT</i>      | 686        | 88         |
|          | <i>PR-Set7</i> | 696        | 90         |

**Table S1.** PH2Av staining. > 750 cells were counted
